# Supplementary material
Source: PubMed Central journal article supplement (PMC7616944)
Supplement: EMS191807-supplement-Supplementary_Materials.pdf [file EMS191807-supplement-Supplementary_Materials.pdf]

Supplemental Electronic Data—Tables and Figure

**Table 1. DISTRIBUTION OF APPROXIMAL CARIES PREVALENCE AT 12, 24, AND 36 MONTHS**

| Prevalence at baseline<br>Type (N) | At 12 months (N=3812) |                   |                    | At 24 months (N=3892) |                   |                    | At 36 months (N=3848) |                   |                    |
|------------------------------------|-----------------------|-------------------|--------------------|-----------------------|-------------------|--------------------|-----------------------|-------------------|--------------------|
|                                    | Total                 | Absence of caries | Presence of caries | Total                 | Absence of caries | Presence of caries | Total                 | Absence of caries | Presence of caries |
|                                    | N (%)                 | N (%)             | N (%)              | N (%)                 | N (%)             | N (%)              | N (%)                 | N (%)             | N (%)              |
| O (261)                            | 220                   | 218 (99.0)        | 2 (1.0)            | 260                   | 258 (99.2)        | 2 (0.8)            | 257                   | 254 (98.8)        | 3 (1.2)            |
| X (148)                            | 129                   | 127 (98.4)        | 2 (1.6)            | 148                   | 145 (98.0)        | 3 (2.0)            | 148                   | 145 (98.0)        | 3 (2.0)            |
| I (3381)                           | 2861                  | 2778 (97.1)       | 83 (2.9)           | 2810                  | 2606 (92.7)       | 204 (7.3)          | 2778                  | 2450 (88.2)       | 328 (11.8)         |
| S (686)                            | 602                   | 562 (93.4)        | 40 (6.6)           | 674                   | 581 (86.4)        | 93 (13.6)          | 665                   | 501 (75.2)        | 165 (24.8)         |

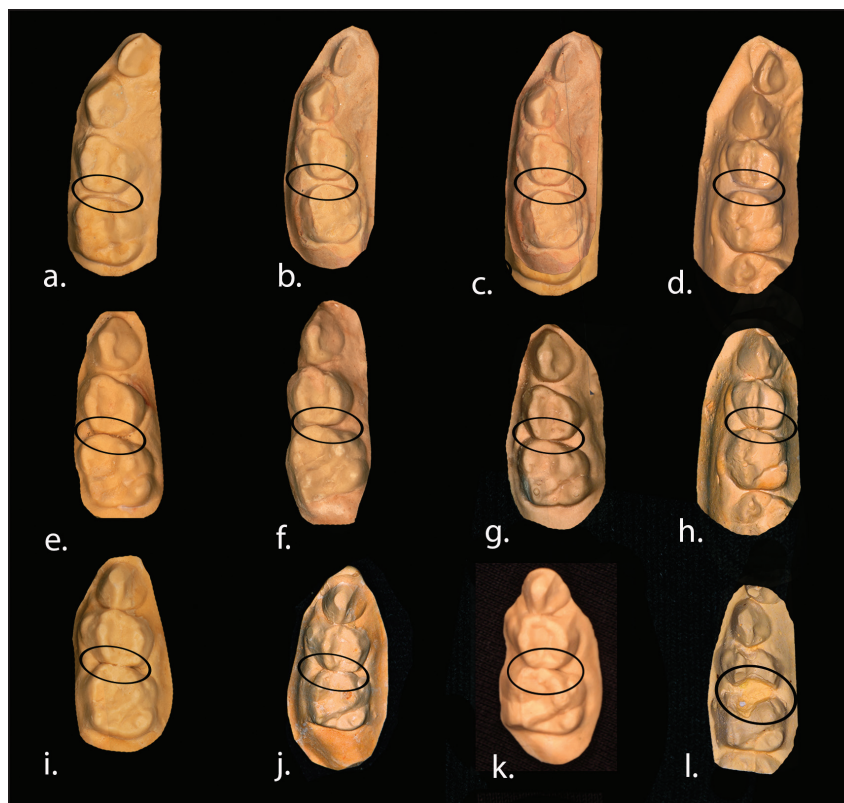

**Figure.** Schematic representation of sectional die models of O, X, and I contacts at baseline, 12, 24, and 36 months of follow-up; a, b, c, and d depict O types of contacts; e, f, g, and h depict X types of contacts; i, j, k, and l depict I types of contacts; and m, n, o, and p depict S types of contacts. The O (d) and X (h) contacts remained caries-free after 36 months. The I-type became carious after 36 months (l).

*Supplemental Data continued on the next page.*

Table 2. UNIVARIATE ANALYSIS BY POISSON REGRESSION WITH A MULTILEVEL APPROACH FOR THE INCIDENCE OF APPROXIMAL CARIES AND THE INDEPENDENT VARIABLES

| Variables                                           | CARIES at 36 Months |             |                   |          | Variables                                        | CARIES at 36 Months |                |                   |          |
|-----------------------------------------------------|---------------------|-------------|-------------------|----------|--------------------------------------------------|---------------------|----------------|-------------------|----------|
|                                                     | No<br>N(%)          | Yes<br>N(%) | RR*<br>(95% CI**) | P-value† |                                                  | No<br>N(%)          | Yes<br>N(%)    | RR*<br>(95% CI**) | P-value† |
| <b>Tooth variables (n=3848 contacts)</b>            |                     |             |                   |          | <b>Child variables - continued</b>               |                     |                |                   |          |
| <i>Type of contact</i>                              |                     |             |                   |          | <i>Use of dental floss</i>                       |                     |                |                   |          |
| O (257)                                             | 254 (98.8)          | 3 (1.2)     | 1                 |          | After every meal (796)                           | 671 (84.3)          | 125 (15.7)     | 1                 |          |
| X (148)                                             | 145 (98.0)          | 3 (2.0)     | 2.2 (0.4, 10.7)   | 0.345    | Twice daily (24)                                 | 24 (100)            | 0 (0)          | 5.01e-09          | 0.998    |
| I (2778)                                            | 2450 (88.2)         | 328 (11.8)  | 13.4 (4.3, 41.7)  | <0.001   | Once (952)                                       | 813 (85.4)          | 139 (14.6)     | 0.9 (0.7, 1.2)    | 0.557    |
| S (665)                                             | 501 (75.2)          | 165 (24.8)  | 23.0 (7.4, 72.2)  | <0.001   | Occasionally (80)                                | 70 (87.5)           | 10 (12.5)      | 1.1 (0.6, 2.1)    | 0.797    |
| <i>Type of quadrant</i>                             |                     |             |                   |          | Never (1956)                                     |                     |                |                   |          |
| Maxillary right (962)                               | 811 (84.3)          | 151 (15.7)  | 1.2 (1.0, 1.6)    | 0.091    | 1734 (88.7)                                      | 222 (11.3)          | 0.7 (0.6, 0.9) | 0.008             |          |
| Maxillary left (962)                                | 807 (83.4)          | 155 (16.6)  | 1.3 (1.0, 1.6)    | 0.055    | <i>Previous dental visit</i>                     |                     |                |                   |          |
| Mandibular left (962)                               | 892 (92.7)          | 70 (7.3)    | 1                 |          | Last 6 months (60)                               | 49 (81.7)           | 11 (18.3)      | 1                 |          |
| Mandibular right (962)                              | 839 (87.2)          | 123 (12.8)  | 0.6 (0.4, 0.8)    | <0.001   | 6 months-1 year (160)                            | 140 (87.5)          | 20 (12.5)      | 0.8 (0.4, 1.7)    | 0.549    |
| <b>Child variables (3848 contacts-962 children)</b> |                     |             |                   |          | 1-5 years (368)                                  |                     |                |                   |          |
| <i>Gender</i>                                       |                     |             |                   |          | 319 (86.7)                                       |                     |                |                   |          |
| Male (1608)                                         | 1413 (88.2)         | 195 (11.8)  | 0.9 (0.8, 1.1)    | 0.218    | >5 years (96)                                    | 90 (93.7)           | 6 (6.3)        | 0.5 (0.2, 1.2)    | 0.114    |
| Female (2240)                                       | 1936 (86.4)         | 304 (13.6)  |                   |          | Never (2140)                                     | 1875 (87.6)         | 265 (12.4)     | 0.8 (0.4, 1.4)    | 0.394    |
| <i>Bottle feeding habit</i>                         |                     |             |                   |          | Don't remember (896)                             |                     |                |                   |          |
| Yes (4)                                             | 4 (100)             | 0 (0)       | 1                 |          | 768 (85.7)                                       | 128 (14.3)          | 0.9 (0.5, 1.7) | 0.768             |          |
| No (3844)                                           | 3345 (87)           | 499 (13)    | 2.28e+07          | 0.998    | Did not answer (112)                             | 95 (84.8)           | 17 (15.2)      | 0.9 (0.4, 1.8)    | 0.673    |
| <i>Children who clean their teeth</i>               |                     |             |                   |          | <i>Last professional fluoride application</i>    |                     |                |                   |          |
| Yes (3728)                                          | 3241 (86.9)         | 487 (13.1)  | 1                 |          | Yes (36)                                         | 31 (86.1)           | 5 (13.9)       | 1                 |          |
| No (120)                                            | 108 (90)            | 12 (10)     | 0.8 (0.4, 1.4)    | 0.361    | No (3712)                                        | 3237 (87.2)         | 475 (12.8)     | 1.2 (0.5, 2.8)    | 0.741    |
| <i>Mode of tooth brushing</i>                       |                     |             |                   |          | Don't know (92)                                  |                     |                |                   |          |
| Toothbrush (3840)                                   | 3341 (87)           | 499 (13)    | 1                 |          | 75 (81.5)                                        | 17 (18.5)           | 1.7 (0.6, 4.5) | 0.323             |          |
| Others (8)                                          | 8 (100)             | 0 (0)       | 4.52e-08          | 0.998    | <i>Frequency of snacking per day</i>             |                     |                |                   |          |
| <i>Supervision while toothbrushing</i>              |                     |             |                   |          | Never (8)                                        |                     |                |                   |          |
| Child alone (2240)                                  | 1919 (85.7)         | 321 (14.3)  | 1                 |          | 8 (100)                                          | 0 (0)               | 9.35e-09       | 0.999             |          |
| Parent alone (628)                                  | 556 (88.5)          | 72 (11.5)   | 0.8 (0.6, 1.0)    | 0.092    | Occasionally (364)                               | 323 (88.7)          | 41 (11.3)      | 1                 |          |
| Sometimes child, sometimes parent (980)             | 874 (89.2)          | 106 (10.8)  | 0.8 (0.6, 0.9)    | 0.029    | 1-2 times (3016)                                 | 2611 (86.6)         | 405 (13.4)     | 1.2 (0.9, 1.7)    | 0.212    |
| <i>Age when started brushing</i>                    |                     |             |                   |          | 3-4 times (404)                                  |                     |                |                   |          |
| < 18 months (688)                                   | 593 (86.2)          | 95 (13.8)   | 1                 |          | 354 (87.6)                                       | 50 (12.4)           | 1.2 (0.8, 1.8) | 0.447             |          |
| > 18 months (3156)                                  | 2752 (87.2)         | 404 (12.8)  | 0.9 (0.7, 1.1)    | 0.143    | 5 or >5 times (48)                               | 45 (93.7)           | 3 (6.3)        | 0.7 (0.2, 2.1)    | 0.468    |
| <i>Use of toothpaste</i>                            |                     |             |                   |          | Don't know (8)                                   |                     |                |                   |          |
| Yes (3248)                                          | 2845 (87.6)         | 403 (12.4)  | 1                 |          | 8 (100)                                          | 0 (0)               | 9.23e-09       | 0.999             |          |
| No (540)                                            | 459 (85)            | 81 (15)     | 1.2 (1.0, 1.6)    | 0.099    | <i>Frequency of intake of sugary items</i>       |                     |                |                   |          |
| Don't know (60)                                     | 45 (75)             | 15 (25)     | 1.9 (1.2, 3.2)    | 0.012    | Yes (3104)                                       | 2719 (87.6)         | 385 (12.4)     | 0.8 (0.7, 0.98)   | 0.033    |
| <i>Frequency of mouth rinse</i>                     |                     |             |                   |          | No (736)                                         |                     |                |                   |          |
| After every meal (700)                              | 604 (86.3)          | 96 (13.7)   | 1                 |          | 622 (84.5)                                       | 114 (15.5)          | 1              |                   |          |
| Twice daily (432)                                   | 370 (85.6)          | 62 (14.4)   | 1.1 (0.8, 1.5)    | 0.531    | Don't know (8)                                   | 8 (100)             | 0 (0)          | 5.72e-09          | 0.999    |
| Once (2608)                                         | 2283 (87.5)         | 325 (12.5)  | 0.9 (0.8, 1.2)    | 0.572    | <i>Frequency of intake of non-sugary items</i>   |                     |                |                   |          |
| Occasionally (72)                                   | 63 (87.5)           | 9 (12.5)    | 0.9 (0.4, 1.7)    | 0.639    | Yes (3132)                                       | 2751 (87.8)         | 381 (12.2)     | 1                 |          |
| Never (24)                                          | 19 (79.2)           | 5 (20.8)    | 1.2 (0.5, 2.9)    | 0.711    | No (708)                                         | 590 (83.3)          | 118 (16.7)     | 1.4 (1.1, 1.7)    | 0.002    |
| <i>Frequency of tooth brushing</i>                  |                     |             |                   |          | Don't know (8)                                   |                     |                |                   |          |
| After every meal (284)                              | 235 (82.7)          | 49 (17.3)   | 1                 |          | 8 (100)                                          | 0 (0)               | 4.79e-08       | 0.997             |          |
| Twice daily (672)                                   | 561 (83.5)          | 111 (16.5)  | 0.9 (0.7, 1.3)    | 0.715    | <i>Habit of brushing after snacking</i>          |                     |                |                   |          |
| Once (1088)                                         | 930 (85.5)          | 158 (14.5)  | 0.9 (0.6, 1.2)    | 0.312    | Always (184)                                     | 159 (86.4)          | 25 (13.6)      | 1                 |          |
| Occasionally (336)                                  | 305 (90.7)          | 31 (9.3)    | 1.1 (0.8, 1.4)    | 0.009    | Occasionally (2820)                              | 2438 (86.4)         | 382 (13.6)     | 1.1 (0.7, 1.6)    | 0.73     |
| Never (1456)                                        | 1308 (89.8)         | 148 (10.2)  | 1.3 (0.7, 1.9)    | 0.002    | Never (820)                                      | 730 (89)            | 90 (11)        | 0.9 (0.6, 1.3)    | 0.482    |
|                                                     |                     |             |                   |          | Don't know (8)                                   |                     |                |                   |          |
|                                                     |                     |             |                   |          | 8 (100)                                          |                     |                |                   |          |
|                                                     |                     |             |                   |          | 0 (0)                                            |                     |                |                   |          |
|                                                     |                     |             |                   |          | 4.56e-08                                         |                     |                |                   |          |
|                                                     |                     |             |                   |          | 0.997                                            |                     |                |                   |          |
|                                                     |                     |             |                   |          | <i>Habit of sleeping directly after snacking</i> |                     |                |                   |          |
|                                                     |                     |             |                   |          | Always (920)                                     |                     |                |                   |          |
|                                                     |                     |             |                   |          | 817 (88.8)                                       |                     |                |                   |          |
|                                                     |                     |             |                   |          | 103 (11.2)                                       |                     |                |                   |          |
|                                                     |                     |             |                   |          | 1                                                |                     |                |                   |          |
|                                                     |                     |             |                   |          | Occasionally (1948)                              |                     |                |                   |          |
|                                                     |                     |             |                   |          | 1691 (86.8)                                      |                     |                |                   |          |
|                                                     |                     |             |                   |          | 257 (13.2)                                       |                     |                |                   |          |
|                                                     |                     |             |                   |          | 1.1 (0.9, 1.4)                                   |                     |                |                   |          |
|                                                     |                     |             |                   |          | 0.37                                             |                     |                |                   |          |
|                                                     |                     |             |                   |          | Never (964)                                      |                     |                |                   |          |
|                                                     |                     |             |                   |          | 827 (85.8)                                       |                     |                |                   |          |
|                                                     |                     |             |                   |          | 137 (14.2)                                       |                     |                |                   |          |
|                                                     |                     |             |                   |          | 1.2 (0.9, 1.5)                                   |                     |                |                   |          |
|                                                     |                     |             |                   |          | 0.221                                            |                     |                |                   |          |
|                                                     |                     |             |                   |          | Don't know (4)                                   |                     |                |                   |          |
|                                                     |                     |             |                   |          | 4 (100)                                          |                     |                |                   |          |
|                                                     |                     |             |                   |          | 0 (0)                                            |                     |                |                   |          |
|                                                     |                     |             |                   |          | 7.37e-08                                         |                     |                |                   |          |
|                                                     |                     |             |                   |          | 0.999                                            |                     |                |                   |          |
|                                                     |                     |             |                   |          | <i>Socioeconomic status</i>                      |                     |                |                   |          |
|                                                     |                     |             |                   |          | Upper middle (232)                               |                     |                |                   |          |
|                                                     |                     |             |                   |          | 217 (93.5)                                       |                     |                |                   |          |
|                                                     |                     |             |                   |          | 15 (6.5)                                         |                     |                |                   |          |
|                                                     |                     |             |                   |          | 0.6 (0.3, 0.9)                                   |                     |                |                   |          |
|                                                     |                     |             |                   |          | 0.03                                             |                     |                |                   |          |
|                                                     |                     |             |                   |          | Lower middle (1068)                              |                     |                |                   |          |
|                                                     |                     |             |                   |          | 932 (87.3)                                       |                     |                |                   |          |
|                                                     |                     |             |                   |          | 136 (12.7)                                       |                     |                |                   |          |
|                                                     |                     |             |                   |          | 1.0 (0.8, 1.3)                                   |                     |                |                   |          |
|                                                     |                     |             |                   |          | 0.837                                            |                     |                |                   |          |
|                                                     |                     |             |                   |          | Upper lower (988)                                |                     |                |                   |          |
|                                                     |                     |             |                   |          | 832 (84.2)                                       |                     |                |                   |          |
|                                                     |                     |             |                   |          | 156 (15.8)                                       |                     |                |                   |          |
|                                                     |                     |             |                   |          | 1.3 (1.1, 1.7)                                   |                     |                |                   |          |
|                                                     |                     |             |                   |          | 0.007                                            |                     |                |                   |          |
|                                                     |                     |             |                   |          | Lower (1560)                                     |                     |                |                   |          |
|                                                     |                     |             |                   |          | 1368 (87.7)                                      |                     |                |                   |          |
|                                                     |                     |             |                   |          | 192 (12.3)                                       |                     |                |                   |          |

\* RR=Relative risk. \*\* CI= Confidence interval. † P-value=Significance.

Table 3. MEANS AND MEDIANS FOR SURVIVAL TIME OF OXIS CONTACTS

| Means and medians for survival time |                 |            |                         |             |          |            |                         |             |
|-------------------------------------|-----------------|------------|-------------------------|-------------|----------|------------|-------------------------|-------------|
| Type of contact                     | Mean*           |            |                         |             | Median   |            |                         |             |
|                                     | Estimate        | Std. error | 95% Confidence interval |             | Estimate | Std. error | 95% Confidence interval |             |
|                                     |                 |            | Lower bound             | Upper bound |          |            | Lower bound             | Upper bound |
| O                                   | <b>1066.718</b> | 2.431      | 1061.953                | 1071.483    | –        | –          | –                       | –           |
| X                                   | <b>1061.893</b> | 6.320      | 1049.507                | 1074.280    | –        | –          | –                       | –           |
| I                                   | <b>1042.146</b> | 2.606      | 1037.039                | 1047.254    | 1073.000 | .000       | –                       | –           |
| S                                   | <b>1012.262</b> | 6.463      | 999.593                 | 1024.930    | 1071.000 | .356       | 1070.302                | 1071.698    |
| Overall                             | 1041.641        | 3.008      | 1035.746                | 1047.536    | 1073.000 | 1.418      | 1070.221                | 1075.779    |

\* Estimation is limited to the largest survival time if it is censored.
